# Supplementary material for: Disparities in cannabis use and documentation in electronic health records among children and young adults
Source: Springer Nature journal article supplement (doi:10.1038/s41746-023-00885-w), 2023-08-08
Supplement: MOESM1 [file 41746_2023_885_MOESM1_ESM-1.pdf]

## Supplementary Materials

**Supplementary Table 1 Characteristics of patients with and without cannabis documentation excluding medical cannabis.** P-values are calculated from generalized linear mixed models. aOR for female patients is calculated relative to the male patients. aOR for different races is calculated relative to white patients. The “Other” race group consists of Native American, Alaska native, native Hawaiian or other Pacific Islander, and multi-racial patients. For SVI, aOR is calculated per every 0.01 point change.

| Characteristics   | Documented Patients | Not Documented Patients | aOR<br>(95% CI)         | P-Value         |
|-------------------|---------------------|-------------------------|-------------------------|-----------------|
| Total Sample, No. | 20,312              | 348,248                 | NR                      | NR              |
| Sex, No (%)       |                     |                         |                         |                 |
| Female            | 10,739 (52.9%)      | 183,311(52.6%)          | 1.098<br>(1.061, 1.137) | <b>&lt;.001</b> |
| Male              | 9,572 (47.1%)       | 164,901 (47.4%)         | NR                      | NR              |
| Unknown           | 1 (<0.1%)           | 36 (<0.1%)              | NR                      | NR              |
| Race, No. (%)     |                     |                         |                         |                 |
| Asian             | 365 (1.8%)          | 8,057 (2.3%)            | 0.826<br>(0.735, 0.928) | <b>.001</b>     |
| Black             | 3,303 (16.3%)       | 14,403 (4.1%)           | 3.713<br>(3.514, 3.924) | <b>&lt;.001</b> |
| Hispanic          | 3,427 (16.9%)       | 21,188 (6.1%)           | 2.362<br>(2.236, 2.495) | <b>&lt;.001</b> |
| Other             | 1,134 (5.6%)        | 16,723 (4.8%)           | 1.200<br>(1.117, 1.290) | <b>&lt;.001</b> |
| White             | 10,133 (49.9%)      | 195,849 (56.2%)         | NR                      | NR              |
| Unavailable       | 1,950 (9.6%)        | 92,028 (26.4%)          | NR                      | NR              |
| SVI, mean (SD)    | 0.308 (0.267)       | 0.269 (0.243)           | 1.001<br>(1.001, 1.002) | <b>&lt;.001</b> |

**Dictionary of cannabis related keywords:**

[marijuana, cbd, cannabis, thc, weed, mj, epidiolex, cannabidiol, marinol, dronabinol, syndros, cesamet, nabilone]

**List of keywords considered as misspellings of marijuana:**

[miajuana, mariujana, majjuana, marjuuana, marijuaan, marajuina, marijuanaa, marijuania, marijuuana, marijaua, marrijuanna, mirajauna, mirajuana, marjuuanna, marijauna, marijana, marijauana, majjuana, mariuanna, maraijuana, majauana, marajuan, marujauna, marijauan, marajuna, miarjuana, marijuanana, mairijuana, mairuana, marjuuana, marjuanna, marujuana, marijuahana, marijauaba, marajuauna, marajuanna, marinuana, mairjauna, mariajuana, marijauaa, marajuana, majruana, marijuiana, marijuaa, marijauann, mjarijuana, marjuania, mairjuana, marjianua, maruijuanna, marinujana, marijana, marujana, marjauna, marijaunua, maurjuana, marijuaua, marjujuana, marajuia, marajana, majuana, mariujuana, mariuana, marijurana, marjuiana, marjuana, marajauna, marajuana, mariaja, marujanna, marijuanaat, marijunaa, marajanna, marijuaana, maijuana, marijuanna]

**Filtering out notes related to common bile duct (CBD):** if the clinical note is screened because of the keyword ‘cbd’ and any of the substrings in list CBD\_KEY appear in it then it’s flagged and filtered out. Note that the substrings in CBD\_KEY can be anywhere in the clinical note, meaning words such as gastro, gastroenterology, gastrointestinal, etc. all match with gastro in CBD\_KEY and cause the clinical note to be filtered out.

CBD\_KEY = [abdominal, gallbladder, pancreas, common bile duct, cbd dilation, gastro]

**Filtering out notes related to allergy detection (weed):** if the clinical note is screened because of the keyword ‘weed’ and any of the substrings in list ALLERG\_KEY appear in it then it’s flagged and filtered out. Note that the substrings in ALLERG\_KEY can be anywhere in the clinical note, meaning words such as allergy, allergic, allergens, etc. all match with allerg in ALLERG\_KEY and cause the clinical note to be filtered out.

ALLERG\_KEY = [pollen, allerg]
